# Supplementary material for: Buccal Resveratrol Delivery System as a Potential New Concept for the Periodontitis Treatment
Source: PubMed Central journal article supplement (PMC8003728; doi:10.3390/pharmaceutics13030417), 2021-03-20
Supplement: pharmaceutics-13-00417-s001.pdf [file pharmaceutics-13-00417-s001.pdf]

# Supplementary Material: Buccal Resveratrol Delivery System as a Potential New Concept for the Periodontitis Treatment

Magdalena Paczkowska-Walendowska, Jakub Dvořák, Natalia Rosiak, Ewa Tykarska, Emilia Szymańska, Katarzyna Winnicka, Marek A. Ruchała and Judyta Cielecka-Piontek

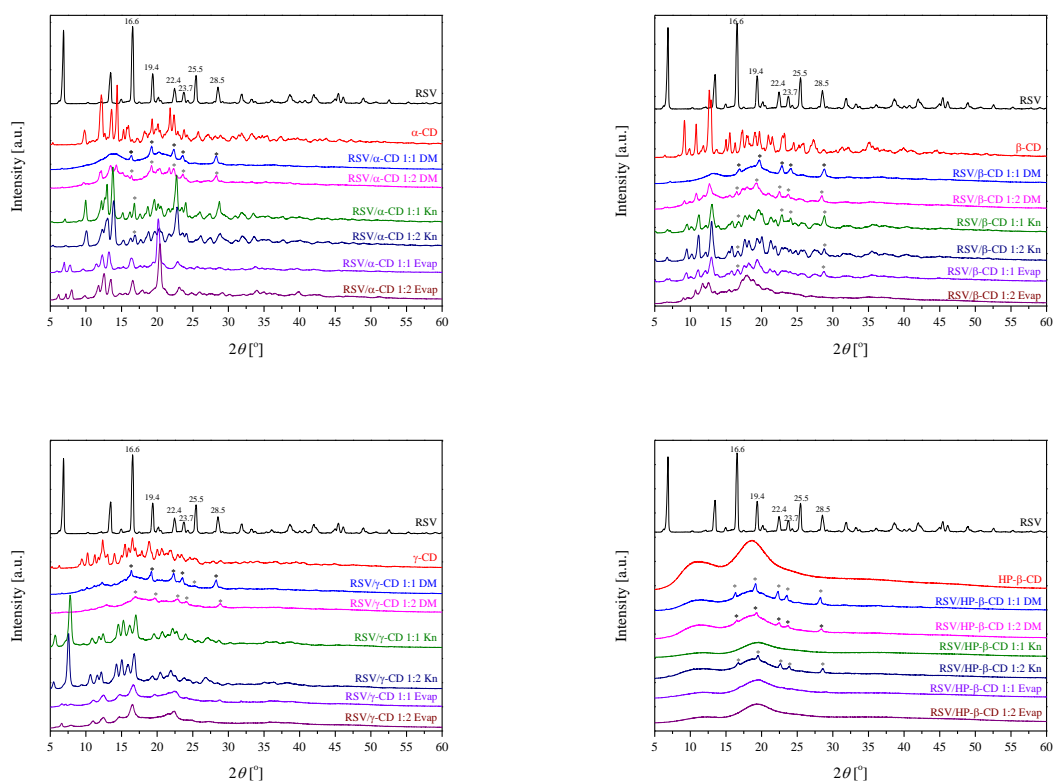

**Figure S1.** X-ray diffractograms of the solid samples.  $2\theta$  positions of the principal diffraction peaks are shown for RSV, while the traces of crystalline RSV peaks in the systems are indicated by “\*”.

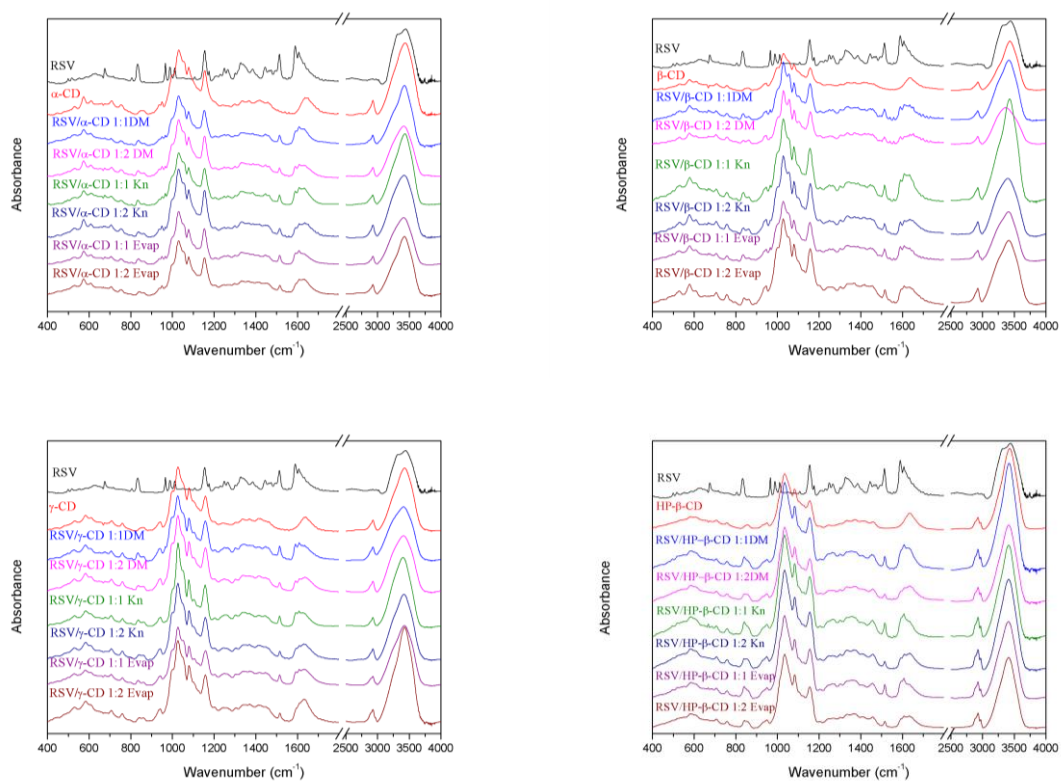

Figure S2. FT-IR spectra of powder RSV/CD systems.

**Table S1.** Validation parameters of the HPLC-DAD method.

| Parameter                                               | Results                         |
|---------------------------------------------------------|---------------------------------|
| Linearity: $y = ax + b$                                 |                                 |
| $a \pm S_a$                                             | $54\,072.50 \pm 2.00$           |
| $b \pm S_b$                                             | insignificant ( $\alpha=0.05$ ) |
| Correlation coefficient ( $r$ )                         | 0.9999                          |
| Range of linearity [ $\text{mg mL}^{-1}$ ]              | 0.1–40.0                        |
| Intra-day precision, RSD (<5% required) = repeatability |                                 |
| 0.4 [ $\text{mg mL}^{-1}$ ]                             | 0.57                            |
| 4.0 [ $\text{mg mL}^{-1}$ ]                             | 0.11                            |
| 40.0 [ $\text{mg mL}^{-1}$ ]                            | 0.14                            |
| Inter-day precision = reproducibility                   |                                 |
| 0.4 [ $\text{mg mL}^{-1}$ ]                             | 0.52                            |
| 4.0 [ $\text{mg mL}^{-1}$ ]                             | 1.09                            |
| 40.0 [ $\text{mg mL}^{-1}$ ]                            | 0.79                            |
| Limit of detection (LOD) [ $\mu\text{g mL}^{-1}$ ]      | 1.81                            |
| Limit of quantification (LOQ) [ $\mu\text{g mL}^{-1}$ ] | 5.48                            |

$S_a$  standard deviation of slope;  $S_b$  standard deviation of intercept,  $t$ , calculated values of the Student's  $t$  test,  $t_{\alpha,f} = 2.228$  critical values of the Student's test for degrees of freedom  $f = 10$  and significance level  $\alpha = 0.05$ .

**Table S2.** The antioxidant effect of RSV/CD powder systems.

|                      | <b>DPPH</b><br><b>IC<sub>50</sub> [µg mL<sup>-1</sup>]</b> | <b>CUPRAC</b><br><b>[IC<sub>0.5</sub> µg mL<sup>-1</sup>]</b> |
|----------------------|------------------------------------------------------------|---------------------------------------------------------------|
| RSV                  | 22.1                                                       | 33.2                                                          |
| RSV/α-CD 1:1 DM      | 21.1                                                       | 32.5                                                          |
| RSV/α-CD 1:2 DM      | 21.1                                                       | 32.5                                                          |
| RSV/α-CD 1:1 Kn      | 25.0                                                       | 26.3                                                          |
| RSV/α-CD 1:2 Kn      | 25.6                                                       | 26.5                                                          |
| RSV/α-CD 1:1 Evap    | 24.5                                                       | 26.4                                                          |
| RSV/α-CD 1:2 Evap    | 24.5                                                       | 25.5                                                          |
| RSV/β-CD 1:1 DM      | 20.3                                                       | 25.0                                                          |
| RSV/β-CD 1:2 DM      | 20.9                                                       | 25.8                                                          |
| RSV/β-CD 1:1 Kn      | 21.0                                                       | 26.7                                                          |
| RSV/β-CD 1:2 Kn      | 21.3                                                       | 26.3                                                          |
| RSV/β-CD 1:1 Evap    | 27.1                                                       | 30.1                                                          |
| RSV/β-CD 1:2 Evap    | 23.6                                                       | 25.8                                                          |
| RSV/HP-β-CD 1:1 DM   | 26.7                                                       | 33.1                                                          |
| RSV/HP-β-CD 1:2 DM   | 24.3                                                       | 33.1                                                          |
| RSV/HP-β-CD 1:1 Kn   | 26.5                                                       | 31.1                                                          |
| RSV/HP-β-CD 1:2 Kn   | 25.1                                                       | 34.6                                                          |
| RSV/HP-β-CD 1:1 Evap | 27,5                                                       | 33.2                                                          |
| RSV/HP-β-CD 1:2 Evap | 21.9                                                       | 30.1                                                          |
| RSV/γ-CD 1:1 DM      | 22.2                                                       | 24.8                                                          |
| RSV/γ-CD 1:2 DM      | 21.9                                                       | 24.3                                                          |
| RSV/γ-CD 1:1 Kn      | 20.3                                                       | 27.2                                                          |
| RSV/γ-CD 1:2 Kn      | 21.3                                                       | 25.5                                                          |
| RSV/γ-CD 1:1 Evap    | 18.2                                                       | 23.7                                                          |
| RSV/γ-CD 1:2 Evap    | 20.3                                                       | 25.8                                                          |
| F1                   | 20.6                                                       | 31.6                                                          |
| F2                   | 23.1                                                       | 28.7                                                          |
| F3                   | 23.1                                                       | 26.5                                                          |
| F4                   | 22.4                                                       | 32.3                                                          |
| F5                   | 24.0                                                       | 32.5                                                          |

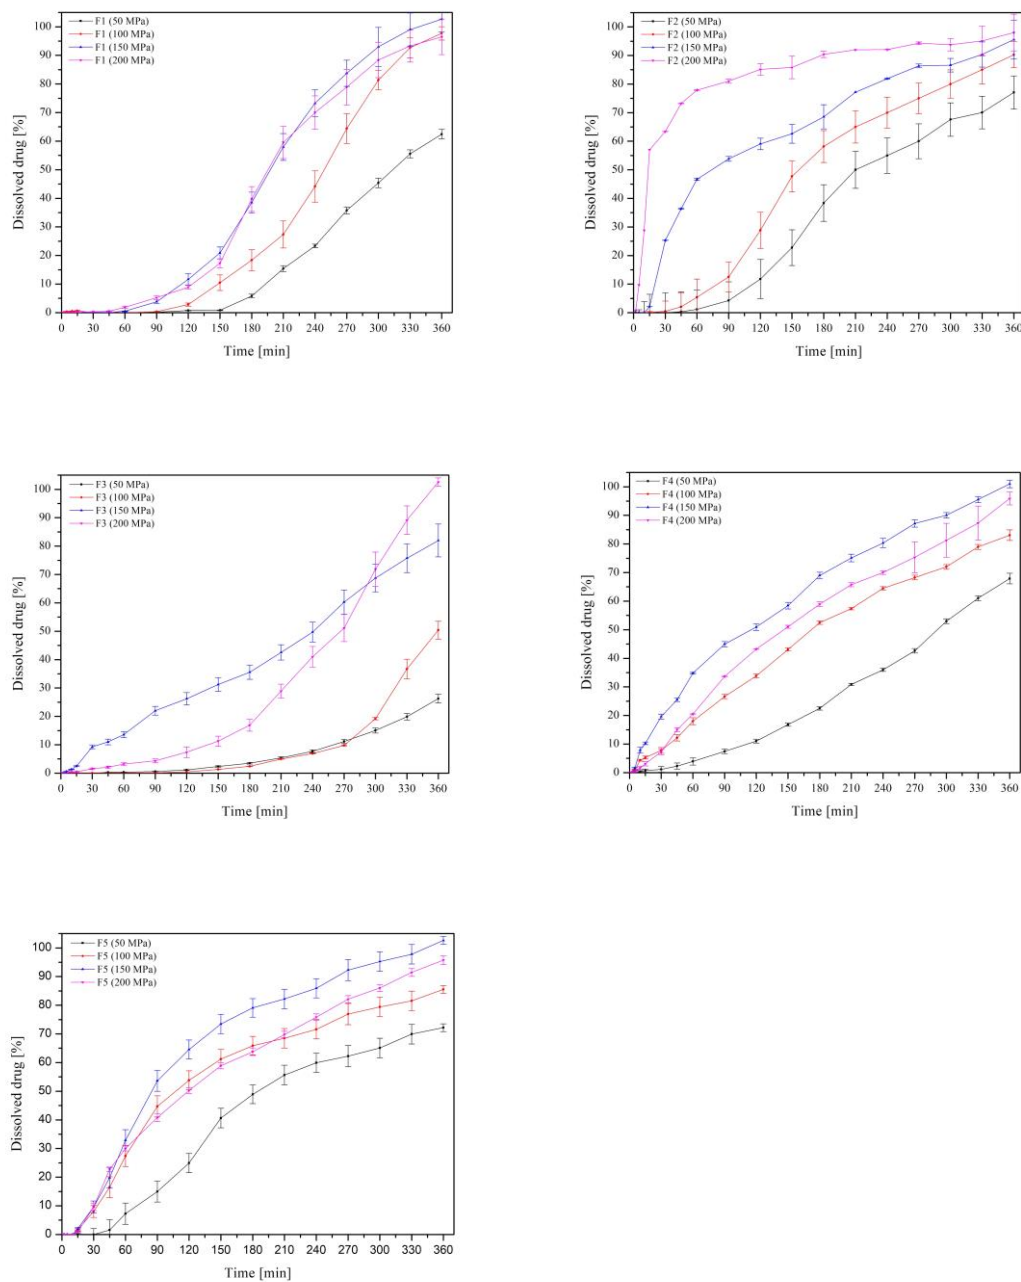

Figure S3. Dissolution profiles of the RSV/CD tablets (F1-F5).

Table S3. Mathematical characteristics of the RSV/CD tablets (F1-F5)

| Formulation | Mathematical model |                |                     |                |                 |                |                          |                |        |
|-------------|--------------------|----------------|---------------------|----------------|-----------------|----------------|--------------------------|----------------|--------|
|             | Zero-order kinetic |                | First-order kinetic |                | Higuchi kinetic |                | Korsmeyer-Peppas kinetic |                |        |
|             | K                  | R <sup>2</sup> | K                   | R <sup>2</sup> | K               | R <sup>2</sup> | K                        | R <sup>2</sup> | n      |
| F1 (7.5 kN) | 18.99              | <b>0.9474</b>  | 1.0396              | 0.7715         | 6.3796          | 0.8058         | 1.8203                   | 0.6785         | 0.3542 |
| F1 (10 kN)  | 17.982             | <b>0.944</b>   | 1.0711              | 0.8658         | 6.0566          | 0.8065         | 2.0376                   | 0.7895         | 0.3716 |
| F2 (7.5 kN) | 16.23              | 0.8835         | 0.7931              | 0.4958         | 6.3349          | <b>0.9534</b>  | 0.7005                   | 0.6532         | 0.339  |
| F2 (10 kN)  | 12.732             | 0.5988         | 0.4198              | 0.327          | 5.9132          | <b>0.8268</b>  | 1.1829                   | 0.6022         | 0.2357 |
| F3 (7.5 kN) | 13.391             | <b>0.9939</b>  | 0.713               | 0.764          | 4.7674          | 0.9253         | 0.5358                   | 0.9077         | 0.2953 |
| F3 (10 kN)  | 15.048             | 0.8756         | 0.8841              | <b>0.9571</b>  | 4.9664          | 0.7237         | 1.3939                   | 0.9158         | 0.3181 |
| F4 (7.5 kN) | 16.998             | 0.9595         | 0.6834              | 0.5208         | 6.4357          | <b>0.9792</b>  | 0.2138                   | 0.7395         | 0.3105 |
| F4 (10 kN)  | 16.428             | <b>0.9808</b>  | 0.7584              | 0.6948         | 6.0052          | 0.9532         | 0.5816                   | 0.8573         | 0.3189 |
| F5 (7.5 kN) | 18.707             | 0.9134         | 0.7535              | 0.6697         | 7.0601          | <b>0.9379</b>  | 0.4167                   | 0.8461         | 0.3229 |
| F5 (10 kN)  | 16.927             | 0.9552         | 0.8368              | 0.5914         | 6.3114          | <b>0.9593</b>  | 0.9099                   | 0.7259         | 0.3446 |

The highest R<sup>2</sup> values in bold.
